# Supplementary material for: The Stimulatory Effects of Intracellular α-Synuclein on Synaptic Transmission Are Attenuated by 2-Octahydroisoquinolin-2(1H)-ylethanamine
Source: MDPI journal article supplement (doi:10.3390/ijms222413253), 2021-12-09
Supplement: s1 [file s1]

| System                                                                                  | Subunit       | $\beta$ -sheet                     | $\alpha$ -helix                   | Turn                              | Coil                               |
|-----------------------------------------------------------------------------------------|---------------|------------------------------------|-----------------------------------|-----------------------------------|------------------------------------|
| $\alpha$ Syn                                                                            | S1            | 46.33 $\pm$ 0.50                   | 0.63 $\pm$ 0.49                   | 0.73 $\pm$ 0.33                   | 52.29 $\pm$ 0.72                   |
|                                                                                         | S2            | 54.89 $\pm$ 0.46                   | 0.15 $\pm$ 0.13                   | 1.11 $\pm$ 0.46                   | 43.83 $\pm$ 0.75                   |
|                                                                                         | S3            | 56.24 $\pm$ 0.76                   | 0.06 $\pm$ 0.06                   | 0.46 $\pm$ 0.32                   | 43.22 $\pm$ 1.06                   |
|                                                                                         | S4            | 56.28 $\pm$ 0.88                   | 0.01 $\pm$ 0.01                   | 0.52 $\pm$ 0.17                   | 43.17 $\pm$ 0.81                   |
|                                                                                         | S5            | 52.70 $\pm$ 0.72                   | 0.22 $\pm$ 0.13                   | 0.78 $\pm$ 0.29                   | 46.28 $\pm$ 1.09                   |
|                                                                                         | S6            | 42.78 $\pm$ 2.00                   | 0.45 $\pm$ 0.26                   | 3.63 $\pm$ 0.61                   | 53.12 $\pm$ 2.24                   |
|                                                                                         | <b>S1-S6*</b> | <b>51.54 <math>\pm</math> 0.68</b> | <b>0.25 <math>\pm</math> 0.08</b> | <b>1.21 <math>\pm</math> 0.14</b> | <b>46.98 <math>\pm</math> 0.83</b> |
| $\alpha$ Syn:M30                                                                        | S1            | 42.01 $\pm$ 1.73                   | 1.85 $\pm$ 0.82                   | 1.39 $\pm$ 0.62                   | 54.74 $\pm$ 0.92                   |
|                                                                                         | S2            | 52.52 $\pm$ 1.21                   | 0.00 $\pm$ 0.00                   | 1.01 $\pm$ 0.45                   | 46.46 $\pm$ 1.63                   |
|                                                                                         | S3            | 54.30 $\pm$ 1.19                   | 0.00 $\pm$ 0.00                   | 0.61 $\pm$ 0.27                   | 45.07 $\pm$ 0.99                   |
|                                                                                         | S4            | 54.72 $\pm$ 1.43                   | 0.00 $\pm$ 0.00                   | 1.10 $\pm$ 0.49                   | 44.17 $\pm$ 2.04                   |
|                                                                                         | S5            | 52.33 $\pm$ 1.07                   | 0.55 $\pm$ 0.24                   | 0.94 $\pm$ 0.42                   | 46.16 $\pm$ 1.74                   |
|                                                                                         | S6            | 40.46 $\pm$ 1.16                   | 0.95 $\pm$ 0.42                   | 2.19 $\pm$ 0.97                   | 56.38 $\pm$ 1.78                   |
|                                                                                         | <b>S1-S6*</b> | <b>49.39 <math>\pm</math> 1.10</b> | <b>0.55 <math>\pm</math> 0.08</b> | <b>1.21 <math>\pm</math> 0.39</b> | <b>48.83 <math>\pm</math> 1.25</b> |
| * Average secondary structure of $\alpha$ Syn and $\alpha$ Syn:M30 fibril (%) $\pm$ SEM |               |                                    |                                   |                                   |                                    |

**Supplementary Table S1:** Average secondary structure content (%)  $\pm$  SEM at each subunit for  $\alpha$ Syn and  $\alpha$ Syn:M30 fibril.
